# Supplementary material for: Theoretical study on the absorption of carbon dioxide by DBU-based ionic liquids
Source: Royal Society of Chemistry journal article supplement (doi:10.1039/d0cp03612a), 2020-01-01
Supplement: d0cp03612a1.pdf [file d0cp03612a1.pdf]

# Theoretical Study on the Absorption of Carbon dioxide by DBU-based Ionic Liquids

Mohammad Izadyar\*<sup>1</sup>, Mojtaba Rezaeian<sup>1</sup>, Alexey Victorov<sup>2</sup>

<sup>1</sup>Computational Chemistry Research Laboratory, Department of Chemistry, Faculty of Science, Ferdowsi University of Mashhad, Mashhad, Iran

<sup>2</sup>Department of Chemistry, St. Petersburg State University, Universitetskaya nab. 7/9, St. Petersburg 199034, Russia

\* Corresponded to: Mohammad Izadyar. Telefax: ++985138805533 (E-mail: [izadyar@um.ac.ir](mailto:izadyar@um.ac.ir))

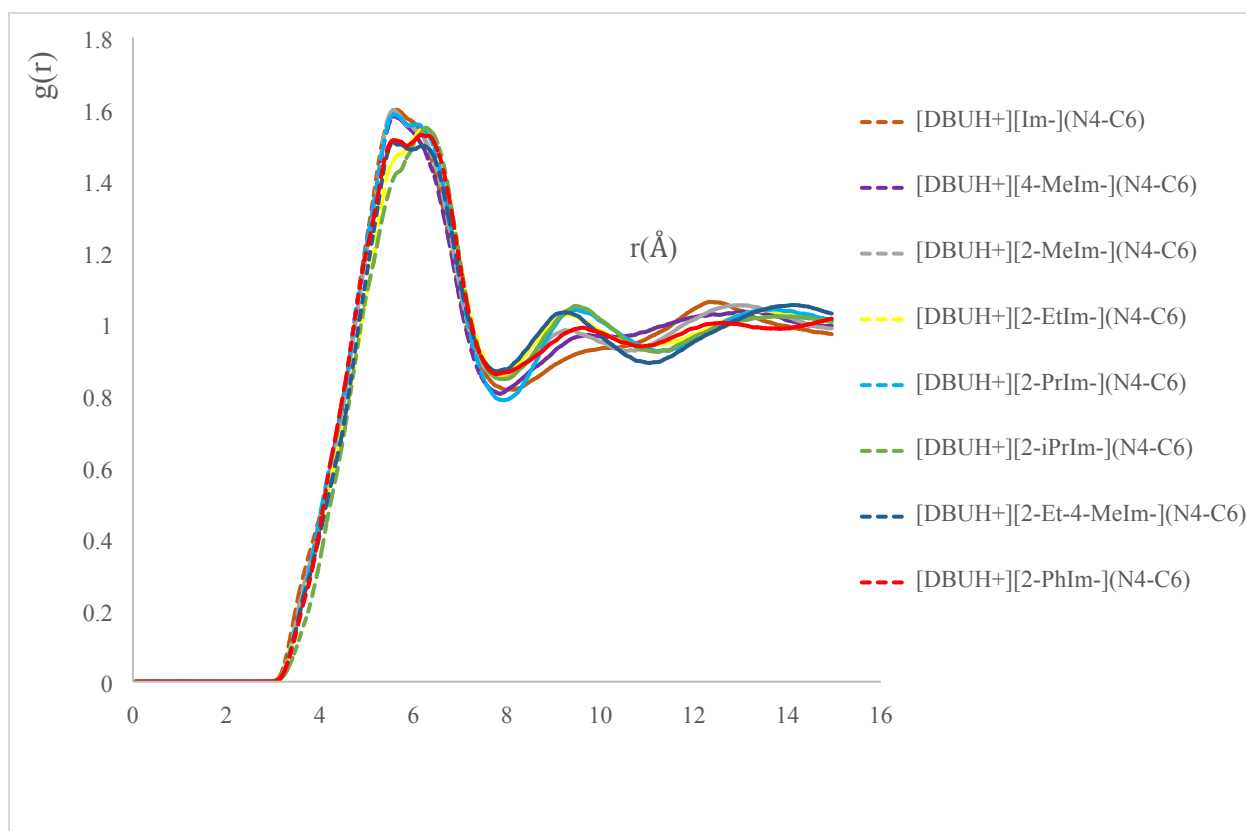

Figure S1. The RDF for interaction between cation-CO<sub>2</sub> in different DBU-based ILs during the 20 ns MD simulations

Table S1. The value of  $r_{\max}$  and  $g(r)_{\max}$  and  $N(r)_{\max}$  in different DBU-based ILs for N1-C6 and N3-C6 interactions in the presence of water molecule.

| Compound                                        | N1-C6 ( $r_{\max}$ ) | $g(r)_{\max}$ | $N(r)$ | N3-C6 ( $r_{\max}$ ) | $g(r)_{\max}$ | $N(r)$ |
|-------------------------------------------------|----------------------|---------------|--------|----------------------|---------------|--------|
| [DBUH <sup>+</sup> ][Im <sup>-</sup> ]          | 3.45                 | 1.29          | 1.99   | 3.45                 | 1.29          | 2.04   |
| [DBUH <sup>+</sup> ][4-MeIm <sup>-</sup> ]      | 3.35                 | 1.24          | 1.81   | 3.35                 | 1.22          | 1.83   |
| [DBUH <sup>+</sup> ][2-MeIm <sup>-</sup> ]      | 3.35                 | 1.13          | 1.68   | 3.35                 | 1.17          | 1.68   |
| [DBUH <sup>+</sup> ][2-EtIm <sup>-</sup> ]      | 3.45                 | 0.84          | 1.05   | 3.35                 | 1.22          | 1.58   |
| [DBUH <sup>+</sup> ][2-PrIm <sup>-</sup> ]      | 3.35                 | 1.18          | 1.58   | 3.45                 | 0.83          | 1.11   |
| [DBUH <sup>+</sup> ][2-iPrIm <sup>-</sup> ]     | 3.35                 | 1.03          | 1.26   | 3.35                 | 1.00          | 1.28   |
| [DBUH <sup>+</sup> ][2-Et-4-MeIm <sup>-</sup> ] | 3.45                 | 0.81          | 1.10   | 3.35                 | 1.33          | 1.45   |
| [DBUH <sup>+</sup> ][2-PhIm <sup>-</sup> ]      | 3.35                 | 1.13          | 1.35   | 3.35                 | 1.26          | 1.42   |

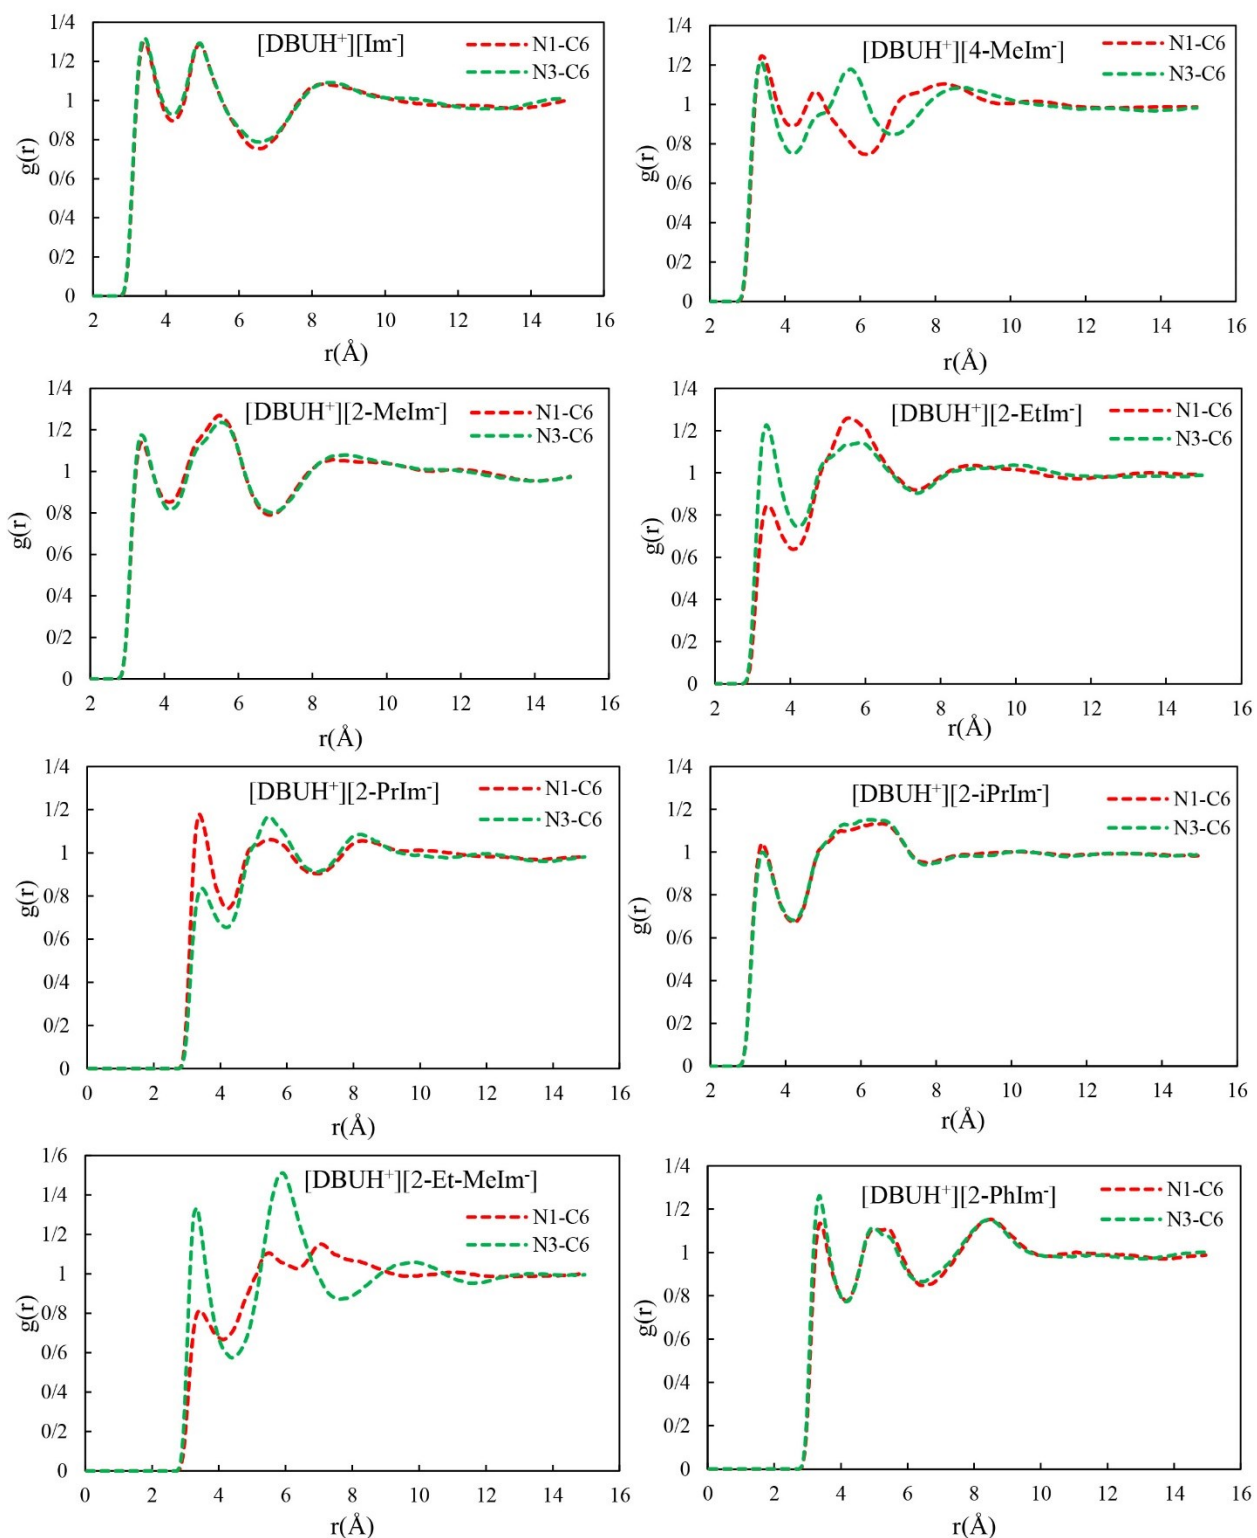

Figure S2. Calculated RDF for interaction between the functionalized imidazole anion and  $\text{CO}_2$  after 20 ns MD simulation in N1... C6 and N3... C6 atoms in the presence of water molecules.

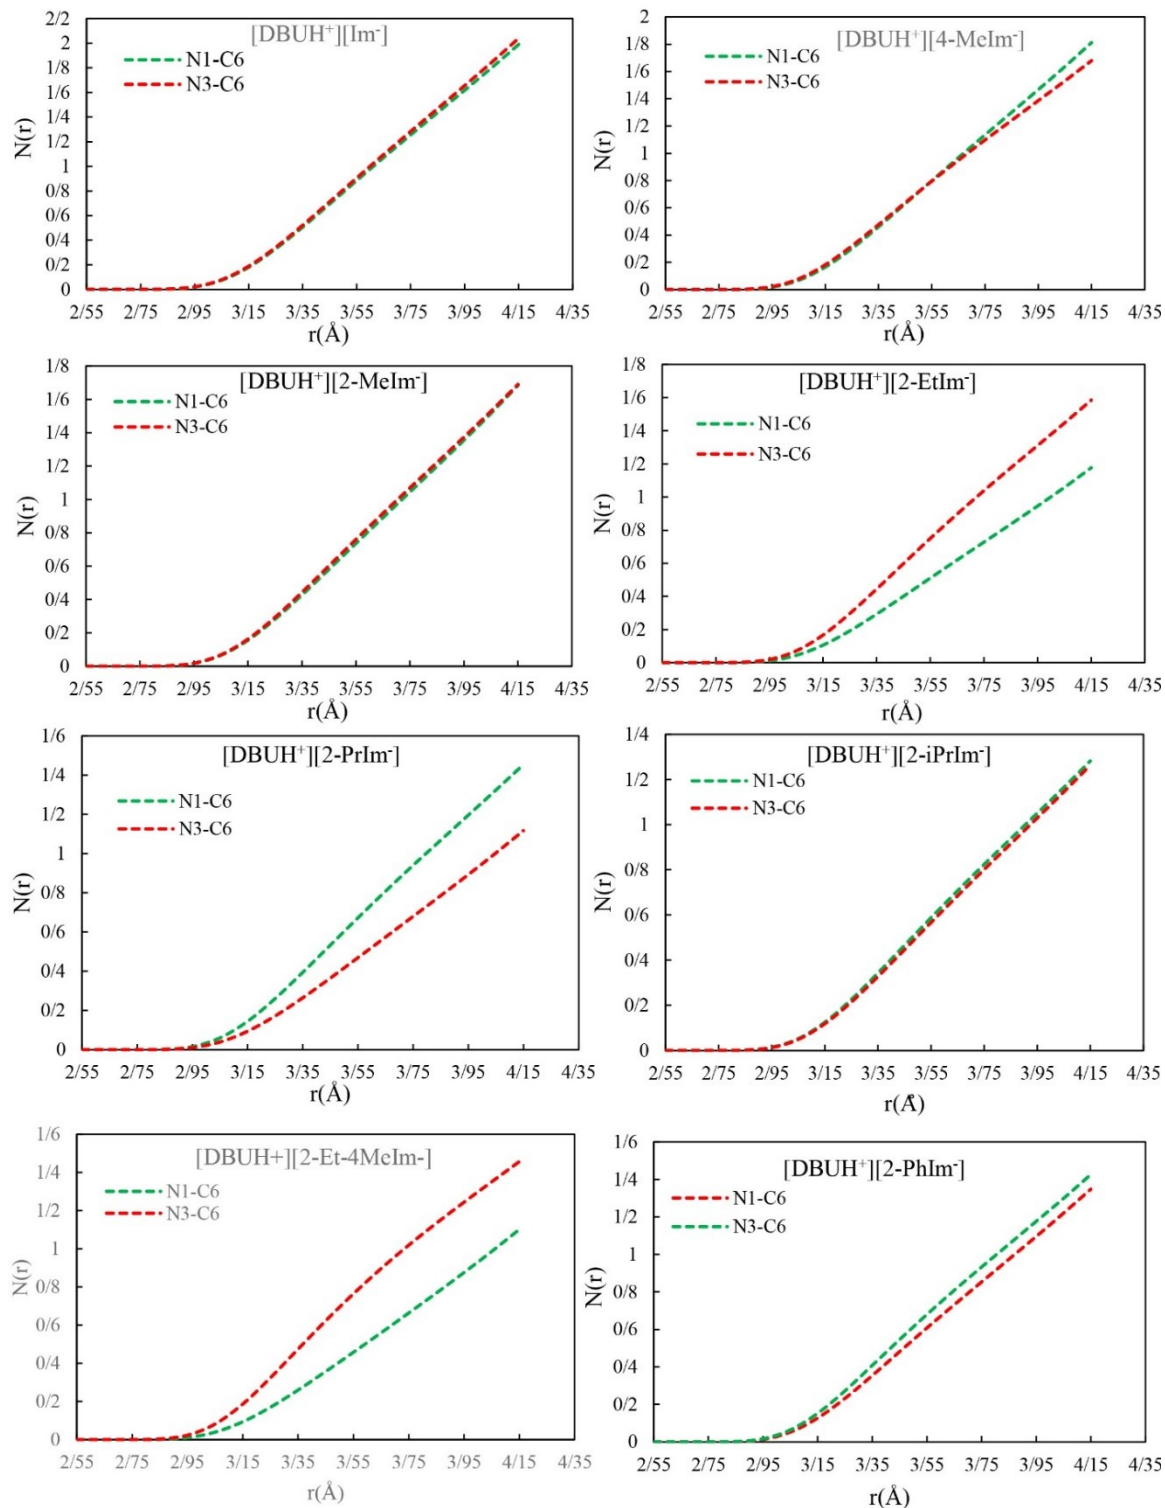

Figure S3. The coordination number of  $\text{CO}_2$  around the Imidazole anion for  $\text{N1}\cdots\text{C6}$  and  $\text{N3}\cdots\text{C6}$  interactions in different DBU-based ILs after 20 ns MD simulations in the presence of water molecules.

Table S2. The  $r_{\max}$  and  $g(r)_{\max}$  for interaction between N1,N3, O9 and H10 atoms of imidazole and water molecules.

| Compound                                        | N1-H10<br>( $r_{\max}$ ) | $g(r)_{\max}$ | N3-H10<br>( $r_{\max}$ ) | $g(r)_{\max}$ | N3-H10<br>( $r_{\max}$ ) | $g(r)_{\max}$ |
|-------------------------------------------------|--------------------------|---------------|--------------------------|---------------|--------------------------|---------------|
| [DBUH <sup>+</sup> ][Im <sup>-</sup> ]          | 1.85                     | 9.40          | 1.85                     | 9.46          | 1.85                     | 1.33          |
| [DBUH <sup>+</sup> ][4-MeIm <sup>-</sup> ]      | 1.85                     | 12.06         | 1.85                     | 7.58          | 1.85                     | 1.87          |
| [DBUH <sup>+</sup> ][2-MeIm <sup>-</sup> ]      | 1.85                     | 8.95          | 1.85                     | 8.43          | 1.85                     | 2.41          |
| [DBUH <sup>+</sup> ][2-EtIm <sup>-</sup> ]      | 1.85                     | 10.85         | 1.85                     | 5.67          | 1.85                     | 1.88          |
| [DBUH <sup>+</sup> ][2-PrIm <sup>-</sup> ]      | 1.85                     | 7.23          | 1.85                     | 9.50          | 1.85                     | 2.41          |
| [DBUH <sup>+</sup> ][2-iPrIm <sup>-</sup> ]     | 1.85                     | 7.23          | 1.85                     | 8.35          | 1.85                     | 3.46          |
| [DBUH <sup>+</sup> ][2-Et-4-MeIm <sup>-</sup> ] | 1.85                     | 12.71         | 1.85                     | 5.83          | 1.85                     | 3.77          |
| [DBUH <sup>+</sup> ][2-PhIm <sup>-</sup> ]      | 1.85                     | 7.89          | 1.85                     | 7.08          | 1.85                     | 4.36          |

Table S3. The Average H-bond angle (°) for interaction between anion and water molecules.

| Compound                                        | Average H-bond angle (°) |
|-------------------------------------------------|--------------------------|
| [DBUH <sup>+</sup> ][Im <sup>-</sup> ]          | 162.307                  |
| [DBUH <sup>+</sup> ][4-MeIm <sup>-</sup> ]      | 162.70                   |
| [DBUH <sup>+</sup> ][2-MeIm <sup>-</sup> ]      | 161.85                   |
| [DBUH <sup>+</sup> ][2-EtIm <sup>-</sup> ]      | 161.95                   |
| [DBUH <sup>+</sup> ][2-PrIm <sup>-</sup> ]      | 160.74                   |
| [DBUH <sup>+</sup> ][2-iPrIm <sup>-</sup> ]     | 160.73                   |
| [DBUH <sup>+</sup> ][2-Et-4-MeIm <sup>-</sup> ] | 161.59                   |
| [DBUH <sup>+</sup> ][2-PhIm <sup>-</sup> ]      | 161.00                   |

Table S4. C-N bond length changes in the reactants, TSs and product in gas phase.

| ILs                                             | Bond Length<br>C6-N(1,3) (Å) |          |         |      |                                    |
|-------------------------------------------------|------------------------------|----------|---------|------|------------------------------------|
|                                                 | Paths                        | Reactant | Product | TS   | $\Delta r^\ddagger = r_{TS} - r_R$ |
| [DBUH <sup>+</sup> ][Im <sup>-</sup> ]          | A                            | 2.68     | 1.51    | 2.20 | -0.48                              |
|                                                 | B                            | 2.63     | 1.51    | 2.25 | -0.38                              |
| [DBUH <sup>+</sup> ][4-MeIm <sup>-</sup> ]      | A                            | 2.61     | 1.49    | 2.22 | -0.39                              |
|                                                 | B                            | 2.60     | 1.50    | 2.25 | -0.35                              |
| [DBUH <sup>+</sup> ][2-MeIm <sup>-</sup> ]      | A                            | 2.70     | 1.50    | 2.21 | -0.49                              |
|                                                 | B                            | 2.69     | 1.50    | 2.28 | -0.41                              |
| [DBUH <sup>+</sup> ][2-EtIm <sup>-</sup> ]      | A                            | 2.64     | 1.52    | 2.22 | -0.42                              |
|                                                 | B                            | 2.67     | 1.51    | 2.13 | -0.54                              |
| [DBUH <sup>+</sup> ][2-PrIm <sup>-</sup> ]      | A                            | 2.65     | 1.47    | 2.21 | -0.44                              |
|                                                 | B                            | 2.64     | 1.53    | 2.26 | -0.38                              |
| [DBUH <sup>+</sup> ][2-iPrIm <sup>-</sup> ]     | A                            | 2.66     | 1.49    | 2.20 | -0.46                              |
|                                                 | B                            | 2.66     | 1.50    | 2.15 | -0.51                              |
| [DBUH <sup>+</sup> ][2-Et-4-MeIm <sup>-</sup> ] | A                            | 2.63     | 1.52    | 2.23 | -0.40                              |
|                                                 | B                            | 5.68     | 1.55    | 2.14 | -0.54                              |
| [DBUH <sup>+</sup> ][2-PhIm <sup>-</sup> ]      | A                            | ----     | ----    | ---- | ----                               |
|                                                 | B                            | 2.70     | 1.52    | 1.84 | -0.86                              |

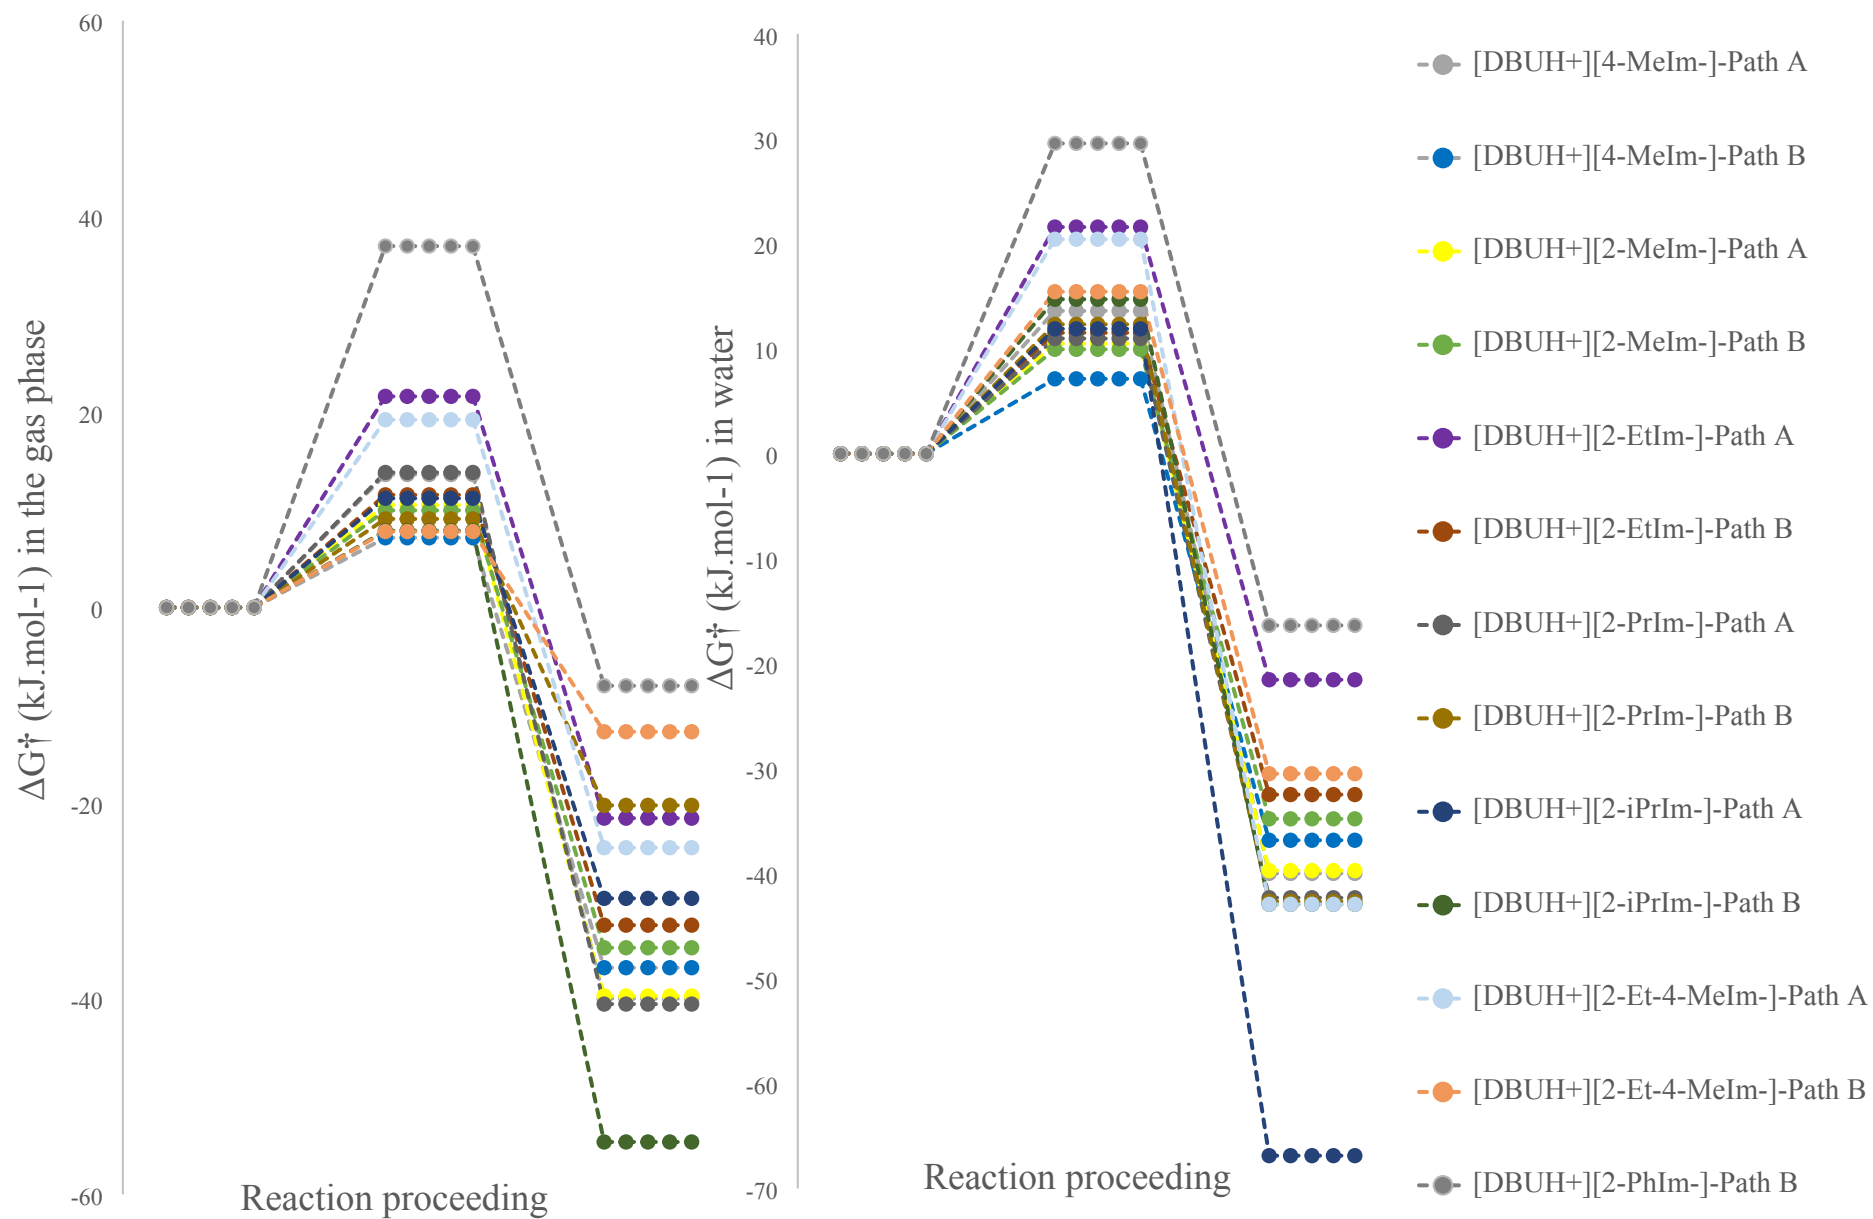

Figure S4. The potential energy diagram of CO<sub>2</sub> absorption by [DBUH<sup>+</sup>][RIm<sup>-</sup>] in the gas phase and water.

Table S5. Main donor-acceptor interaction energies in the reactants, TSs and product at M06-2X level of theory.

|                                                        | Donor $\rightarrow$ Acceptor<br>(Reactant)              | $E(2)_R^*$<br>(kcal.mol <sup>-1</sup> ) | Donor $\rightarrow$ Acceptor<br>(TS)                 | $E(2)_{TS}^*$<br>(kcal.mol <sup>-1</sup> ) | Donor $\rightarrow$ Acceptor<br>(Product)               | $E(2)_P^*$<br>(kcal.mol <sup>-1</sup> ) |
|--------------------------------------------------------|---------------------------------------------------------|-----------------------------------------|------------------------------------------------------|--------------------------------------------|---------------------------------------------------------|-----------------------------------------|
| [DBUH <sup>+</sup> ][Im <sup>-</sup> ]<br>(Path A)     | lp <sub>N3</sub> $\rightarrow\pi^*$ <sub>C6-07</sub>    | 5.78                                    | lp <sub>N1</sub> $\rightarrow\pi^*$ <sub>C6-07</sub> | 28.69                                      | lp <sub>N1</sub> $\rightarrow\pi^*$ <sub>C6-07</sub>    | 34.60                                   |
|                                                        | lp <sub>C6-08</sub> $\rightarrow\sigma^*$ <sub>N3</sub> | 8.43                                    | lp <sub>N1</sub> $\rightarrow\pi^*$ <sub>C6-08</sub> | 4.20                                       | lp <sub>O7</sub> $\rightarrow\sigma^*$ <sub>N1-C6</sub> | 36.98                                   |
|                                                        | $\sum E(2)_R$                                           | 14.21                                   | $\sum E(2)_{TS}$                                     | 32.89                                      | $\sum E(2)_P$                                           | 71.58                                   |
| [DBUH <sup>+</sup> ][Im <sup>-</sup> ]<br>(Path B)     | lp <sub>N3</sub> $\rightarrow\pi^*$ <sub>C6-07</sub>    | 5.78                                    | lp <sub>N3</sub> $\rightarrow\pi^*$ <sub>C6-07</sub> | 2.99                                       | lp <sub>N3</sub> $\rightarrow\pi^*$ <sub>C6-07</sub>    | 27.71                                   |
|                                                        | lp <sub>C6-08</sub> $\rightarrow\sigma^*$ <sub>N3</sub> | 8.43                                    | lp <sub>N3</sub> $\rightarrow\pi^*$ <sub>C6-08</sub> | 24.41                                      | lp <sub>O7</sub> $\rightarrow\sigma^*$ <sub>N3-C6</sub> | 41.89                                   |
|                                                        | $\sum E(2)_R$                                           | 14.21                                   | $\sum E(2)_{TS}$                                     | 27.40                                      | $\sum E(2)_P$                                           | 69.60                                   |
| [DBUH <sup>+</sup> ][4-MeIm <sup>-</sup> ]<br>(Path A) | lp <sub>O8</sub> $\rightarrow\pi^*$ <sub>C6-07</sub>    | 60.54                                   | lp <sub>N1</sub> $\rightarrow\pi^*$ <sub>C6-07</sub> | 26.82                                      | lp <sub>N1</sub> $\rightarrow\pi^*$ <sub>C6-08</sub>    | 35.56                                   |
|                                                        | lp <sub>O8</sub> $\rightarrow\pi^*$ <sub>C6-07</sub>    | 19.94                                   | lp <sub>N1</sub> $\rightarrow\pi^*$ <sub>C6-08</sub> | 3.96                                       | lp <sub>O8</sub> $\rightarrow\pi^*$ <sub>N1-C6</sub>    | 36.44                                   |
|                                                        | $\sum E(2)_R$                                           | 80.48                                   | $\sum E(2)_{TS}$                                     | 30.78                                      | $\sum E(2)_P$                                           | 72.00                                   |
| [DBUH <sup>+</sup> ][4-MeIm <sup>-</sup> ]<br>(Path B) | lp <sub>O8</sub> $\rightarrow\pi^*$ <sub>C6-07</sub>    | 60.54                                   | lp <sub>N3</sub> $\rightarrow\pi^*$ <sub>C6-08</sub> | 26.05                                      | lp <sub>N3</sub> $\rightarrow\pi^*$ <sub>C6-08</sub>    | 26.79                                   |
|                                                        | lp <sub>O8</sub> $\rightarrow\pi^*$ <sub>C6-07</sub>    | 19.94                                   | lp <sub>N3</sub> $\rightarrow\pi^*$ <sub>C6-07</sub> | 2.22                                       | lp <sub>O8</sub> $\rightarrow\pi^*$ <sub>N1-C6</sub>    | 19.71                                   |
|                                                        | $\sum E(2)_R$                                           | 80.48                                   | $\sum E(2)_{TS}$                                     | 28.27                                      | $\sum E(2)_P$                                           | 46.50                                   |
| [DBUH <sup>+</sup> ][2-MeIm <sup>-</sup> ]<br>(Path A) | lp <sub>N3</sub> $\rightarrow\pi^*$ <sub>C6-07</sub>    | 4.36                                    | lp <sub>N1</sub> $\rightarrow\pi^*$ <sub>C6-07</sub> | 26.56                                      | lp <sub>N1</sub> $\rightarrow\pi^*$ <sub>C6-08</sub>    | 36.50                                   |
|                                                        | lp <sub>O8</sub> $\rightarrow\pi^*$ <sub>C6-07</sub>    | 14.48                                   | lp <sub>N1</sub> $\rightarrow\pi^*$ <sub>C6-08</sub> | 4.81                                       | lp <sub>O8</sub> $\rightarrow\pi^*$ <sub>N1-C6</sub>    | 34.65                                   |
|                                                        | $\sum E(2)_R$                                           | 18.84                                   | $\sum E(2)_{TS}$                                     | 31.37                                      | $\sum E(2)_P$                                           | 71.15                                   |
| [DBUH <sup>+</sup> ][2-MeIm <sup>-</sup> ]<br>(Path B) | lp <sub>N3</sub> $\rightarrow\pi^*$ <sub>C6-07</sub>    | 4.36                                    | lp <sub>N3</sub> $\rightarrow\pi^*$ <sub>C6-08</sub> | 23.34                                      | lp <sub>N3</sub> $\rightarrow\pi^*$ <sub>C6-07</sub>    | 24.94                                   |
|                                                        | lp <sub>O8</sub> $\rightarrow\pi^*$ <sub>C6-07</sub>    | 14.48                                   | lp <sub>N3</sub> $\rightarrow\pi^*$ <sub>C6-07</sub> | 2.61                                       | lp <sub>O7</sub> $\rightarrow\pi^*$ <sub>N3-C6</sub>    | 41.08                                   |
|                                                        | $\sum E(2)_R$                                           | 18.84                                   | $\sum E(2)_{TS}$                                     | 25.95                                      | $\sum E(2)_P$                                           | 39.02                                   |
| [DBUH <sup>+</sup> ][2-EtIm <sup>-</sup> ]<br>(Path A) | lp <sub>N1</sub> $\rightarrow\pi^*$ <sub>C6-07</sub>    | 1.40                                    | lp <sub>N1</sub> $\rightarrow\pi^*$ <sub>C6-08</sub> | 3.73                                       | lp <sub>N1-C2</sub> $\rightarrow\pi^*$ <sub>C6-08</sub> | 22.71                                   |
|                                                        | lp <sub>O8</sub> $\rightarrow\pi^*$ <sub>C6-07</sub>    | 11.77                                   | lp <sub>N1</sub> $\rightarrow\pi^*$ <sub>C6-07</sub> | 30.85                                      | lp <sub>O8</sub> $\rightarrow\pi^*$ <sub>N1-C6</sub>    | 40.16                                   |
|                                                        | $\sum E(2)_R$                                           | 13.17                                   | $\sum E(2)_{TS}$                                     | 34.58                                      | $\sum E(2)_P$                                           | 62.87                                   |



|                                                             |                                       |       |                                       |       |                                       |       |
|-------------------------------------------------------------|---------------------------------------|-------|---------------------------------------|-------|---------------------------------------|-------|
| [DBUH <sup>+</sup> ][2-EtIm <sup>-</sup> ]<br>(Path B)      | lp <sub>N1</sub> →π* <sub>C6-07</sub> | 1.40  | lp <sub>N3</sub> →π* <sub>C6-08</sub> | 43.78 | lp <sub>N3</sub> →π* <sub>C6-08</sub> | 33.34 |
|                                                             | lp <sub>O8</sub> →π* <sub>C6-07</sub> | 11.77 | lp <sub>N3</sub> →π* <sub>C6-07</sub> | 1.75  | lp <sub>O8</sub> →π* <sub>N3-C6</sub> | 36.64 |
|                                                             | ΣE(2) <sub>R</sub>                    | 13.17 | ΣE(2) <sub>TS</sub>                   | 45.53 | ΣE(2) <sub>P</sub>                    | 69.98 |
| [DBUH <sup>+</sup> ][2-PrIm <sup>-</sup> ]<br>(Path A)      | lp <sub>N1</sub> →π* <sub>C6-07</sub> | 5.45  | lp <sub>N1</sub> →π* <sub>C6-08</sub> | 6.34  | lp <sub>N1</sub> →π* <sub>C6-07</sub> | 44.38 |
|                                                             | lp <sub>O8</sub> →π* <sub>C6-07</sub> | 37.61 | lp <sub>N1</sub> →π* <sub>C6-07</sub> | 9.56  | lp <sub>O8</sub> →π* <sub>N1-C6</sub> | 31.35 |
|                                                             | ΣE(2) <sub>R</sub>                    | 43.06 | ΣE(2) <sub>TS</sub>                   | 15.9  | ΣE(2) <sub>P</sub>                    | 75.73 |
| [DBUH <sup>+</sup> ][2-PrIm <sup>-</sup> ]<br>(Path B)      | lp <sub>N3</sub> →π* <sub>C6-08</sub> | 5.45  | lp <sub>N3</sub> →π* <sub>C6-08</sub> | 25.02 | lp <sub>N3</sub> →π* <sub>C6-08</sub> | 29.71 |
|                                                             | lp <sub>O8</sub> →π* <sub>C6-07</sub> | 37.61 | lp <sub>N3</sub> →π* <sub>C6-07</sub> | 2.50  | lp <sub>O8</sub> →π* <sub>N3-C6</sub> | 38.87 |
|                                                             | ΣE(2) <sub>R</sub>                    | 43.06 | ΣE(2) <sub>TS</sub>                   | 27.52 | ΣE(2) <sub>P</sub>                    | 68.58 |
| [DBUH <sup>+</sup> ][2-iPrIm <sup>-</sup> ]<br>(Path A)     | lp <sub>N1</sub> →π* <sub>C6-07</sub> | 5.20  | lp <sub>N1</sub> →π* <sub>C6-08</sub> | 6.34  | lp <sub>N1</sub> →π* <sub>C6-08</sub> | 37.81 |
|                                                             | lp <sub>O8</sub> →π* <sub>C6-07</sub> | 14.46 | lp <sub>N1</sub> →π* <sub>C6-07</sub> | 9.56  | lp <sub>O8</sub> →π* <sub>N1-C6</sub> | 34.28 |
|                                                             | ΣE(2) <sub>R</sub>                    | 19.66 | ΣE(2) <sub>TS</sub>                   | 15.90 | ΣE(2) <sub>P</sub>                    | 72.09 |
| [DBUH <sup>+</sup> ][2-iPrIm <sup>-</sup> ]<br>(Path B)     | lp <sub>N3</sub> →π* <sub>C6-07</sub> | 5.20  | lp <sub>N3</sub> →π* <sub>C6-07</sub> | 38.42 | lp <sub>N3</sub> →π* <sub>C6-07</sub> | 24.42 |
|                                                             | lp <sub>O7</sub> →π* <sub>C6-08</sub> | 14.46 | lp <sub>N3</sub> →π* <sub>C6-08</sub> | 1.79  | lp <sub>O7</sub> →π* <sub>N3-C6</sub> | 41.10 |
|                                                             | ΣE(2) <sub>R</sub>                    | 19.66 | ΣE(2) <sub>TS</sub>                   | 40.21 | ΣE(2) <sub>P</sub>                    | 65.52 |
| [DBUH <sup>+</sup> ][2-Et-4-MeIm <sup>-</sup> ]<br>(Path A) | lp <sub>N1</sub> →π* <sub>C6-07</sub> | 1.49  | lp <sub>N1</sub> →π* <sub>C6-08</sub> | 3.57  | lp <sub>O7</sub> →π* <sub>N1-C6</sub> | 38.43 |
|                                                             | lp <sub>O8</sub> →π* <sub>C6-07</sub> | 11.72 | lp <sub>N1</sub> →π* <sub>C6-07</sub> | 29.35 | lp <sub>O8</sub> →π* <sub>N1-C6</sub> | 39.44 |
|                                                             | ΣE(2) <sub>R</sub>                    | 13.21 | ΣE(2) <sub>TS</sub>                   | 32.92 | ΣE(2) <sub>P</sub>                    | 77.87 |
| [DBUH <sup>+</sup> ][2-PhIm <sup>-</sup> ]<br>(Path B)      | lp <sub>N3</sub> →π* <sub>C6</sub>    | 6.25  | lp <sub>N3</sub> →π* <sub>C6-08</sub> | 1.12  | lp <sub>N3</sub> →π* <sub>C6-07</sub> | 25.72 |
|                                                             | lp <sub>O8</sub> →π* <sub>C6-07</sub> | 15.61 | lp <sub>N3</sub> →π* <sub>C6-07</sub> | 2.14  | lp <sub>O7</sub> →π* <sub>N3-C6</sub> | 43.00 |
|                                                             | ΣE(2) <sub>R</sub>                    | 21.86 | ΣE(2) <sub>TS</sub>                   | 3.26  | ΣE(2) <sub>P</sub>                    | 68.72 |

Table S6. Topological parameters at the BCPs of N1-C6 and N3-C6 in the gas phase and water.

| ILs                                             | Path  | BCP   | R         |                |         |      | TS        |                |         |       |
|-------------------------------------------------|-------|-------|-----------|----------------|---------|------|-----------|----------------|---------|-------|
|                                                 |       |       | $\rho(r)$ | $\nabla^2\rho$ | V(r)    | -G/V | $\rho(r)$ | $\nabla^2\rho$ | V(r)    | -G/V  |
| [DBUH <sup>+</sup> ][Im <sup>-</sup> ]          | A (g) | N1-C6 | 0.0190    | 0.0631         | -0.0134 | 1.09 | 0.0489    | 0.1034         | -0.0367 | 0.852 |
|                                                 | B (g) | N3-C6 | 0.0190    | 0.0631         | -0.0134 | 1.09 | 0.0417    | 0.0969         | -0.0303 | 0.900 |
| [DBUH <sup>+</sup> ][4-MeIm <sup>-</sup> ]      | A (g) | N1-C6 | 0.0203    | 0.0660         | -0.0145 | 1.07 | 0.0475    | 0.1029         | -0.0355 | 0.862 |
|                                                 | B (g) | N3-C6 | 0.0203    | 0.0660         | -0.0145 | 1.07 | 0.0444    | 0.0995         | -0.0326 | 0.881 |
| [DBUH <sup>+</sup> ][2-MeIm <sup>-</sup> ]      | A (g) | N1-C6 | 0.0170    | 0.0567         | -0.117  | 1.05 | 0.0486    | 0.1019         | -0.0362 | 0.852 |
|                                                 | B (g) | N3-C6 | 0.0170    | 0.0567         | -0.117  | 1.05 | 0.0417    | 0.0969         | -0.0303 | 0.900 |
| [DBUH <sup>+</sup> ][2-EtIm <sup>-</sup> ]      | A (g) | N1-C6 | 0.0188    | 0.0642         | -0.0136 | 1.09 | 0.0477    | 0.1021         | -0.0357 | 0.857 |
|                                                 | B (g) | N3-C6 | 0.0188    | 0.0642         | -0.0136 | 1.09 | 0.0575    | 0.0983         | -0.0427 | 0.787 |
| [DBUH <sup>+</sup> ][2-PrIm <sup>-</sup> ]      | A (g) | N1-C6 | 0.0190    | 0.0633         | -0.0135 | 1.09 | 0.0480    | 0.1022         | -0.0359 | 0.856 |
|                                                 | B (g) | N3-C6 | 0.0190    | 0.0633         | -0.0135 | 1.09 | 0.0432    | 0.0976         | -0.0314 | 0.888 |
| [DBUH <sup>+</sup> ][2-iPrIm <sup>-</sup> ]     | A (g) | N1-C6 | 0.0180    | 0.0607         | -0.0127 | 1.10 | 0.0497    | 0.1008         | -0.0369 | 0.842 |
|                                                 | B (g) | N3-C6 | 0.0180    | 0.0607         | -0.0127 | 1.10 | 0.0554    | 0.0993         | -0.0411 | 0.802 |
| [DBUH <sup>+</sup> ][2-Et-4-MeIm <sup>-</sup> ] | A (g) | N1-C6 | 0.0191    | 0.0647         | -0.0138 | 1.09 | 0.0465    | 0.101          | -0.0347 | 0.866 |
|                                                 | B (g) | N3-C6 | 0.0191    | 0.0647         | -0.0138 | 1.09 | 0.0564    | 0.0975         | -0.0416 | 0.793 |
| [DBUH <sup>+</sup> ][2-PhIm <sup>-</sup> ]      | B (g) | N3-C6 | 0.0163    | 0.0570         | -0.0115 | 1.12 | 0.0110    | 0.0400         | -0.1030 | 0.548 |

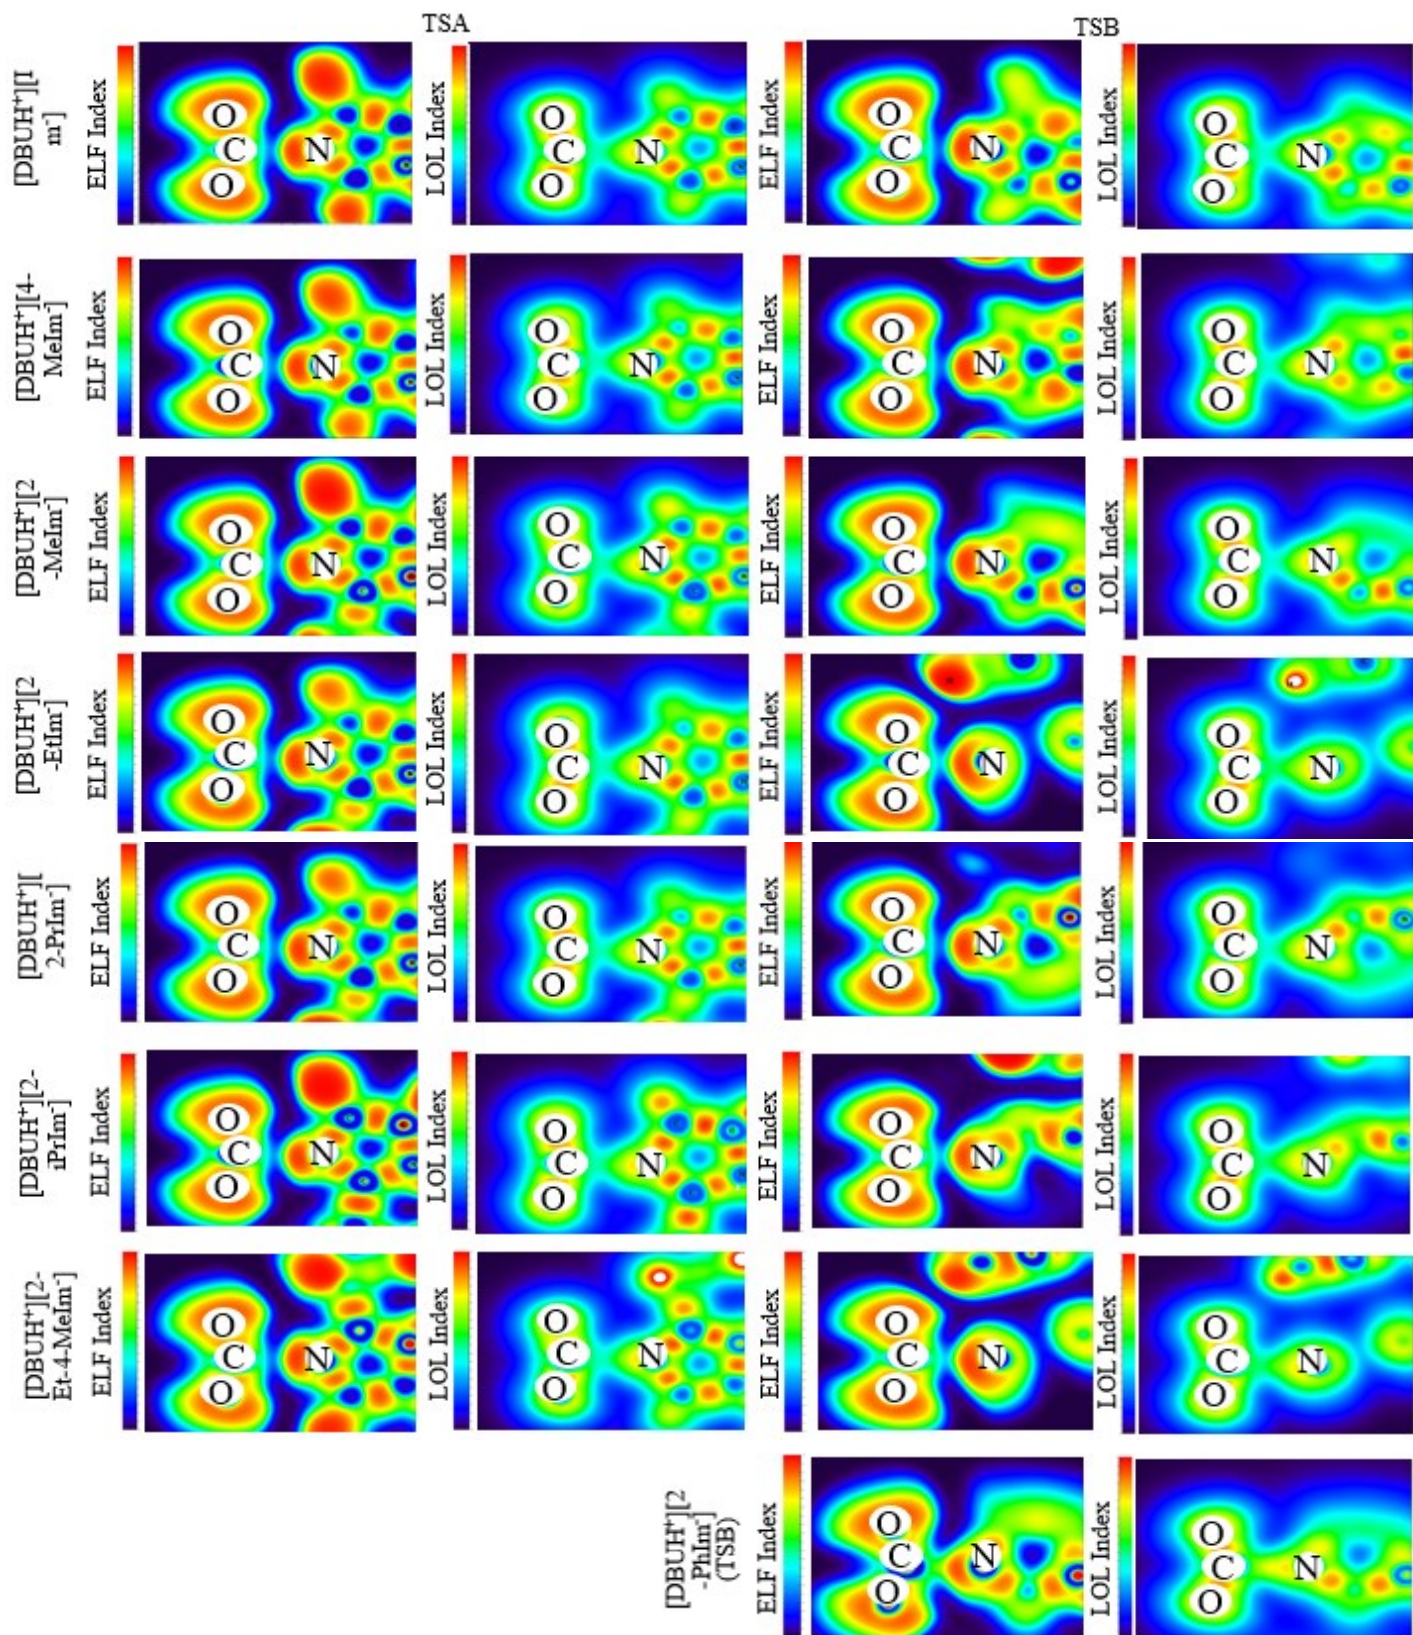

Figure S5. The ELF and LOL diagrams of the N1...C6 and N3...C6 interactions at the BCPs of the TSA and TSB.
